# Supplementary material for: Identification of novel leishmanicidal molecules by virtual and biochemical screenings targeting Leishmania eukaryotic translation initiation factor 4A
Source: PubMed Central journal article supplement (PMC5790279; doi:10.1371/journal.pntd.0006160), 2018-01-18
Supplement: pntd.0006160.s001.pdf [file pntd.0006160.s001.pdf]

| Ligand-free model N°     | 01    | 02    | 03           | <b>04</b>    | 05    | 06    | 07    | 08    | 09    | 10    |
|--------------------------|-------|-------|--------------|--------------|-------|-------|-------|-------|-------|-------|
| Favored (98%)            | 93.0% | 95.3% | 94.0%        | <b>95.3%</b> | 94.5% | 94.0% | 94.3% | 93.8% | 91.3% | 91.8% |
| Allowed (2%)             | 4.2%  | 3.0%  | 4.5%         | <b>3.0%</b>  | 3.2%  | 3.5%  | 4.0%  | 4.5%  | 6.2%  | 5.7%  |
| Outlier (0%)             | 2.7%  | 1.7%  | 1.5%         | <b>1.7%</b>  | 2.2%  | 2.5%  | 1.7%  | 1.7%  | 2.5%  | 2.5%  |
| Substrate-bound model N° | 01    | 02    | <b>03</b>    | 04           | 05    | 06    | 07    | 08    | 09    | 10    |
| Favored (98%)            | 97.5% | 96.8% | <b>97.5%</b> | 97.3%        | 97.3% | 97.3% | 95.5% | 96.0% | 97.3% | 96.5% |
| Allowed (2%)             | 1.7%  | 2.5%  | <b>2.0%</b>  | 2.0%         | 2.2%  | 2.0%  | 3.5%  | 3.0%  | 2.2%  | 3.0%  |
| Outlier (0%)             | 0.7%  | 0.7%  | <b>0.5%</b>  | 0.7%         | 0.5%  | 0.7%  | 1.0%  | 1.0%  | 0.5%  | 0.5%  |
