# Supplementary material for: Identification of novel leishmanicidal molecules by virtual and biochemical screenings targeting Leishmania eukaryotic translation initiation factor 4A
Source: PubMed Central journal article supplement (PMC5790279; doi:10.1371/journal.pntd.0006160), 2018-01-18
Supplement: pntd.0006160.s002.pdf [file pntd.0006160.s002.pdf]

| Compound reference | LV50 promastigotes viability (%) |
|--------------------|----------------------------------|
| R205761 (b)        | 120 $\pm$ 24                     |
| R206644 (c)        | 80 $\pm$ 24                      |
| R210552 (d)        | 116 $\pm$ 11                     |
| R222283 (e)        | 106 $\pm$ 6                      |
| R205435 (f)        | 113 $\pm$ 6                      |
| R209988 (g)        | —                                |
| R210137 (i)        | —                                |
| R184314 (j)        | 60 $\pm$ 6                       |
