# Supplementary material for: Identification of novel leishmanicidal molecules by virtual and biochemical screenings targeting Leishmania eukaryotic translation initiation factor 4A
Source: PubMed Central journal article supplement (PMC5790279; doi:10.1371/journal.pntd.0006160), 2018-01-18
Supplement: pntd.0006160.s003.pdf [file pntd.0006160.s003.pdf]

| Compounds  | Concentration<br>( $\mu\text{M}$ ) | Concentration<br>( $\mu\text{g/ml}$ ) | % infected<br>cells | Number of<br>amastigotes/cell | Infection<br>Index | Inhibition<br>Parasite Index |
|------------|------------------------------------|---------------------------------------|---------------------|-------------------------------|--------------------|------------------------------|
| <b>208</b> | 5                                  | 2.02                                  | 26.50 $\pm$ 9.2     | 0.79 $\pm$ 0.0                | 20.93 $\pm$ 8.6    | 94.11 $\pm$ 6.1              |
|            | 3                                  | 1.21                                  | 27.00 $\pm$ 7.9     | 0.99 $\pm$ 0.3                | 26.73 $\pm$ 14.1   | 92.48 $\pm$ 5.6              |
|            | 1                                  | 0.40                                  | 40.00 $\pm$ 2.8     | 3.15 $\pm$ 0.0                | 126.00 $\pm$ 7.9   | 64.56 $\pm$ 4.7              |
| <b>20</b>  | 5                                  | 2.02                                  | 34.50 $\pm$ 9.2     | 1.74 $\pm$ 1.1                | 60.03 $\pm$ 55.5   | 83.11 $\pm$ 8.6              |
|            | 3                                  | 1.21                                  | 37.00 $\pm$ 1.4     | 2.06 $\pm$ 0.3                | 76.22 $\pm$ 13.1   | 78.56 $\pm$ 4.6              |
|            | 1                                  | 0.40                                  | 41.50 $\pm$ 2.1     | 2.48 $\pm$ 0.0                | 102.92 $\pm$ 6.1   | 71.05 $\pm$ 0.8              |
| <b>48</b>  | 25                                 | 10.07                                 | 21.00 $\pm$ 1.4     | 0.90 $\pm$ 0.2                | 18.90 $\pm$ 6.2    | 94.68 $\pm$ 1.7              |
|            | 5                                  | 2.01                                  | 43.00 $\pm$ 7.1     | 2.34 $\pm$ 0.5                | 100.62 $\pm$ 20.5  | 71.70 $\pm$ 13.4             |
|            | 3                                  | 1.21                                  | 41.50 $\pm$ 2.1     | 3.32 $\pm$ 0.0                | 137.78 $\pm$ 7.9   | 61.24 $\pm$ 4.7              |
| CNTRL      | -                                  | -                                     | 65.11 $\pm$ 4.5     | 5.46 $\pm$ 1.0                | 355.50 $\pm$ 145.3 | -                            |
