# Supplementary material for: Identification of novel leishmanicidal molecules by virtual and biochemical screenings targeting Leishmania eukaryotic translation initiation factor 4A
Source: PubMed Central journal article supplement (PMC5790279; doi:10.1371/journal.pntd.0006160), 2018-01-18

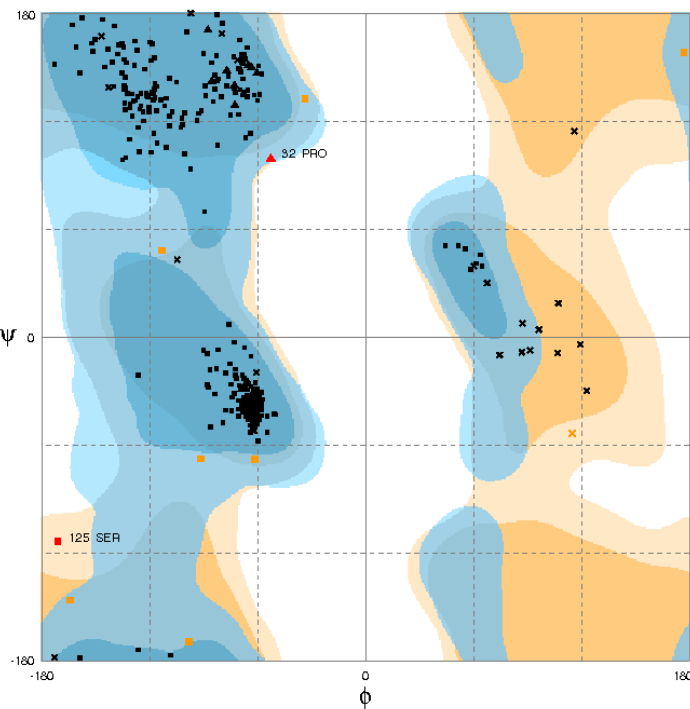

(a) Holo-LieIF

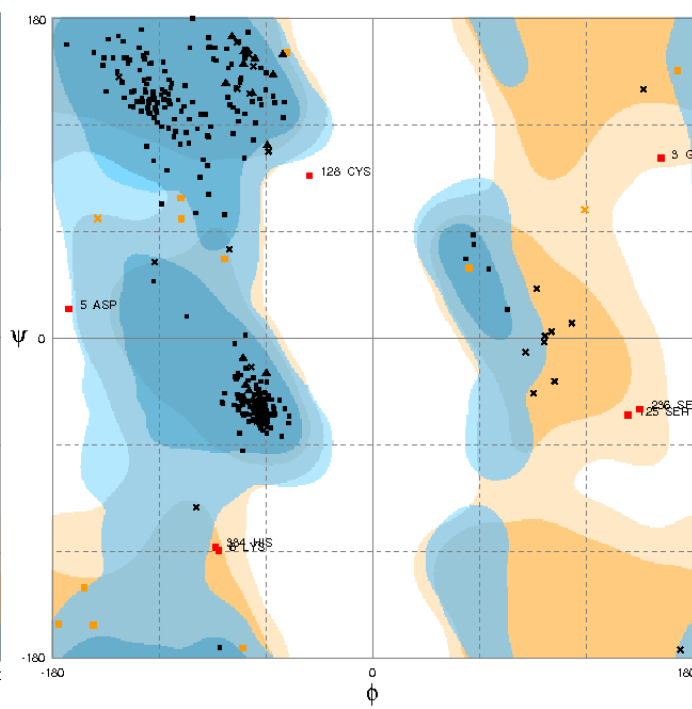

(b) Apo-LieIF

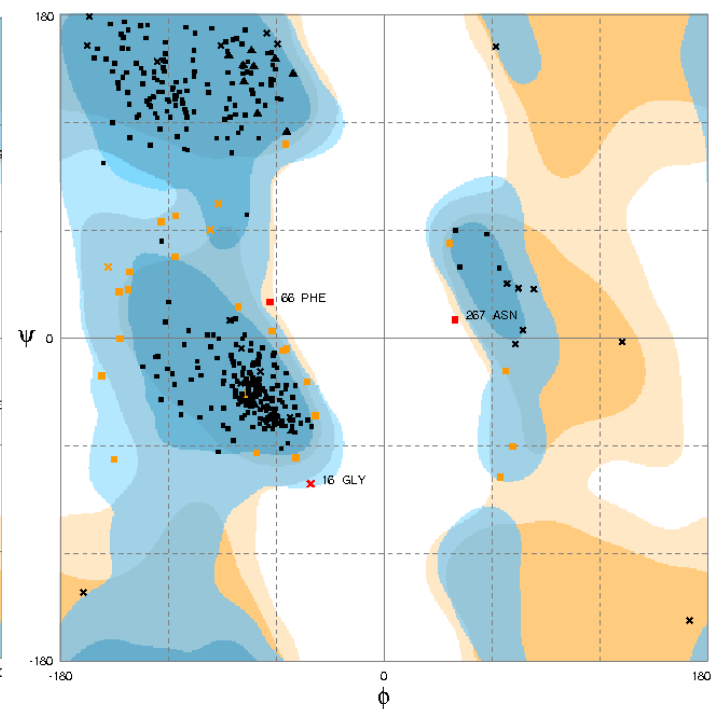

(c) Apo-LieIF<sub>trunc/MD</sub>

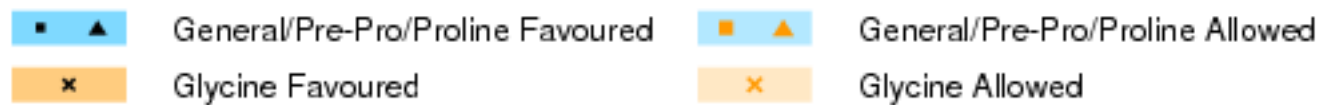

Supplement: pntd.0006160.s004.pdf [file pntd.0006160.s004.pdf]
