# Supplementary material for: Identification of novel leishmanicidal molecules by virtual and biochemical screenings targeting Leishmania eukaryotic translation initiation factor 4A
Source: PubMed Central journal article supplement (PMC5790279; doi:10.1371/journal.pntd.0006160), 2018-01-18
Supplement: pntd.0006160.s007.pdf [file pntd.0006160.s007.pdf]

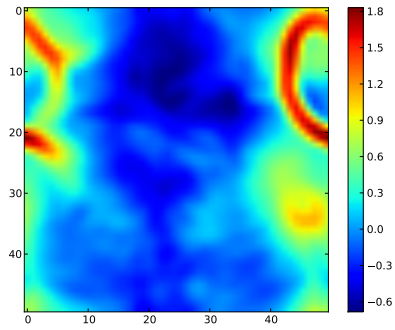

(a) uMatrix for P1 (Dock)

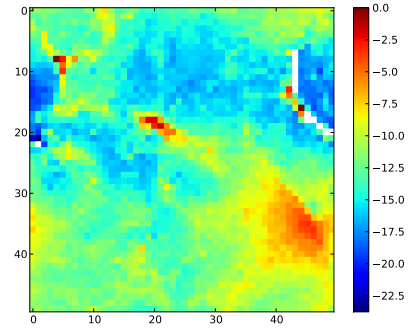

(b) Docking scores for P1 (Dock)

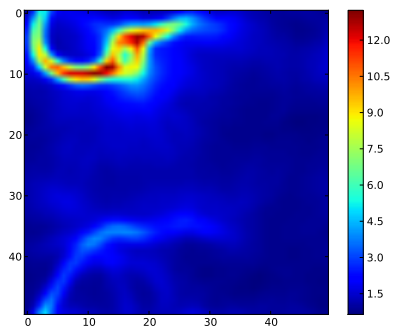

(c) uMatrix for P2 (Dock)

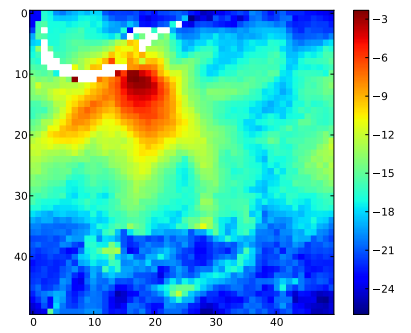

(d) Docking scores for P2 (Dock)

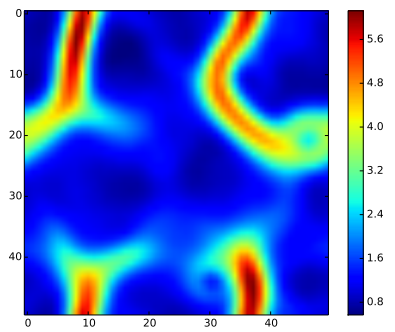

(e) uMatrix for P2 (ADvina)

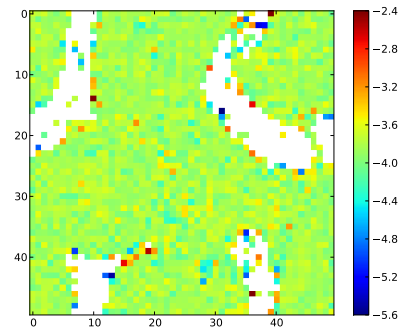

(f) Docking scores for P2 (Dvina)
