# Supplementary material for: Identification of novel leishmanicidal molecules by virtual and biochemical screenings targeting Leishmania eukaryotic translation initiation factor 4A
Source: PubMed Central journal article supplement (PMC5790279; doi:10.1371/journal.pntd.0006160), 2018-01-18
Supplement: pntd.0006160.s008.pdf [file pntd.0006160.s008.pdf]

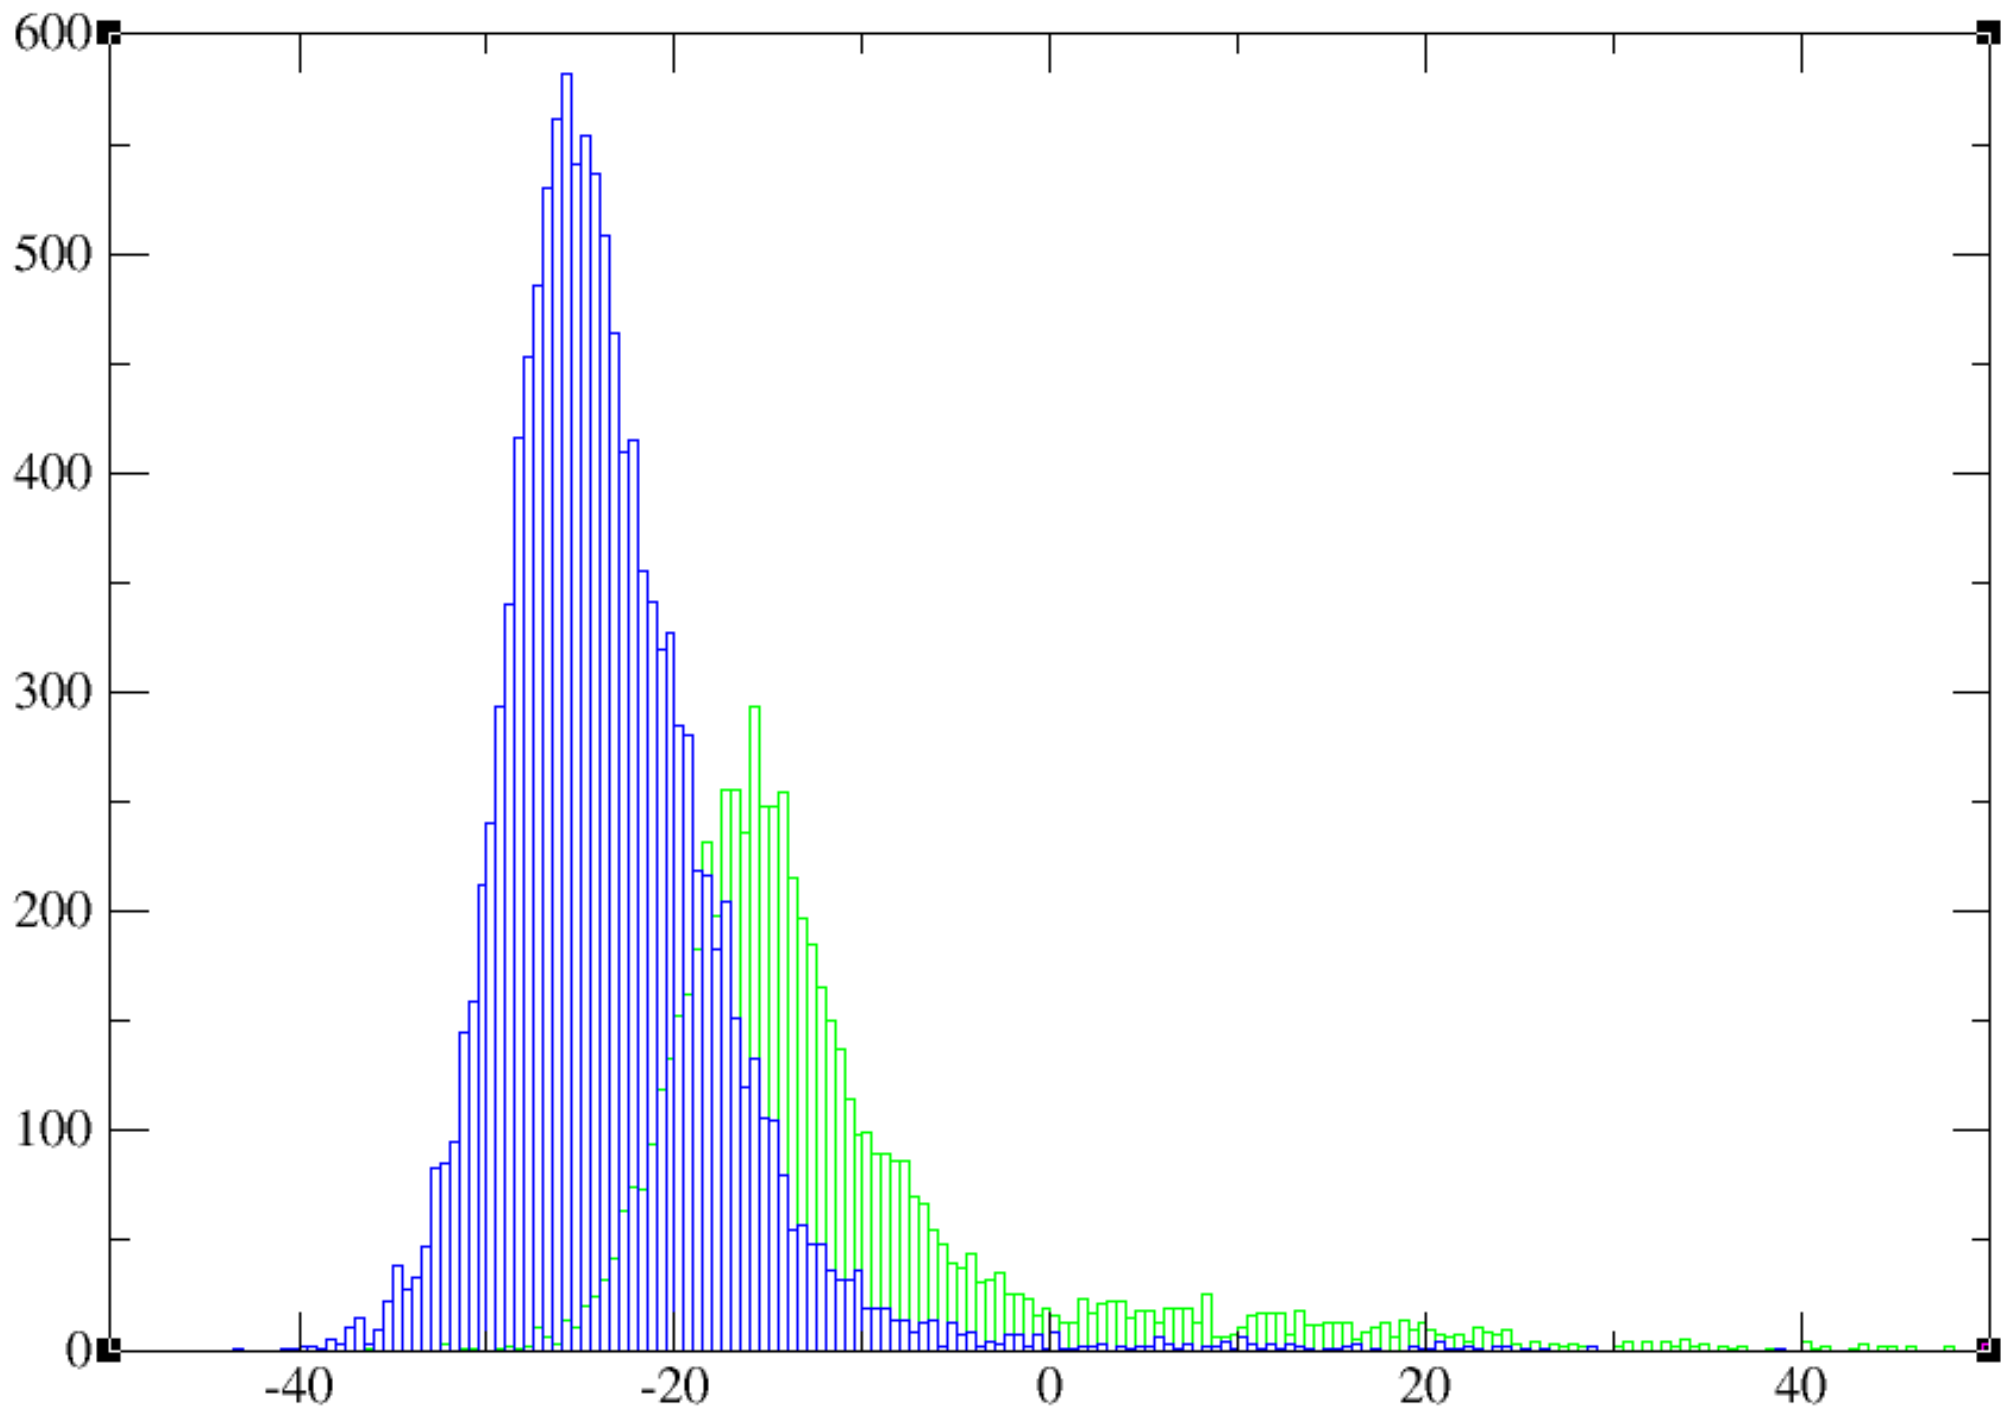

Dock scores on pocket P2
