# Supplementary material for: Identification of novel leishmanicidal molecules by virtual and biochemical screenings targeting Leishmania eukaryotic translation initiation factor 4A
Source: PubMed Central journal article supplement (PMC5790279; doi:10.1371/journal.pntd.0006160), 2018-01-18
Supplement: pntd.0006160.s009.pdf [file pntd.0006160.s009.pdf]

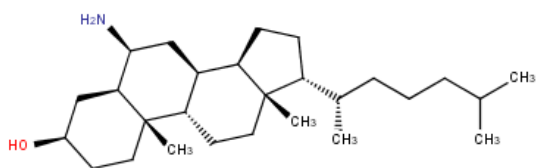

(a) MR26620 (20)

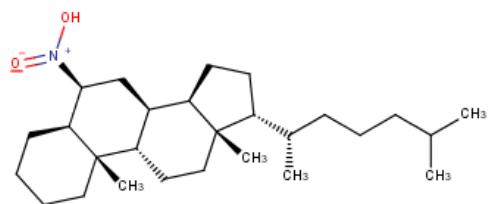

(b) R205761

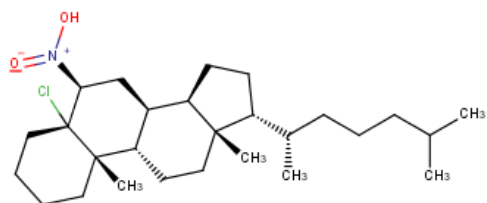

(c) R206644

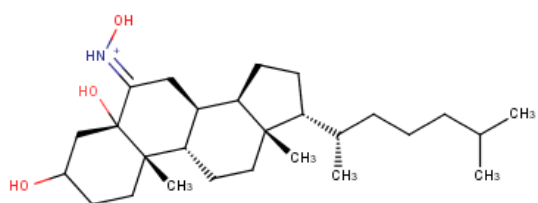

(d) R210552

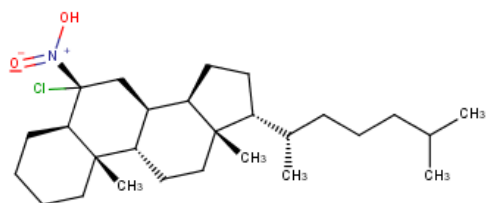

(e) R222283

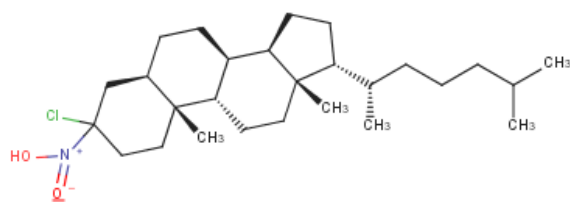

(f) 205435

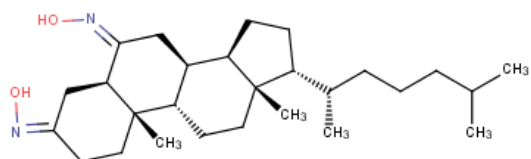

(g) R209988

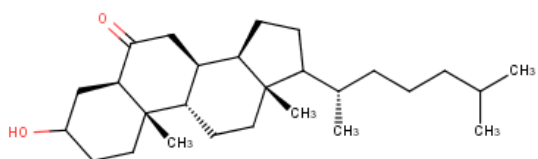

(h) K1250 (48)

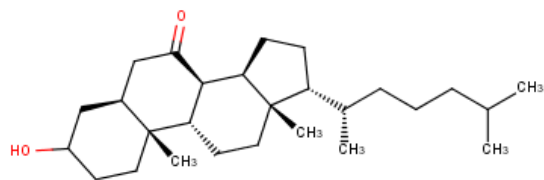

(i) R210137

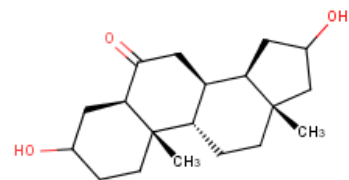

(j) R184314
